# Supplementary material for: Analysis of the Structural Mechanism of ATP Inhibition at the AAA1 Subunit of Cytoplasmic Dynein-1 Using a Chemical “Toolkit”
Source: Int J Mol Sci. 2021 Jul 19;22(14):7704. doi: 10.3390/ijms22147704 (PMC8304172; doi:10.3390/ijms22147704)
Supplement: Supplementary file 1 [file ijms-22-07704-s001.zip › ijms-1240017-supplementary.pdf]

## Supplementary Information

### **Analysis of the Structural Mechanism of ATP Inhibition at the AAA1 Subunit of Cytoplasmic Dynein-1 Using a Chemical “Toolkit”**

Sayi'Mone Tati, Laleh Alisaraie \*

School of Pharmacy, Memorial University of Newfoundland, 300 Prince Philip Dr, A1B 3V6,  
St. John's, Newfoundland, Canada

\* Corresponding author

*Email: [laleh.alisaraie@mun.ca](mailto:laleh.alisaraie@mun.ca)*

**Figure S1**

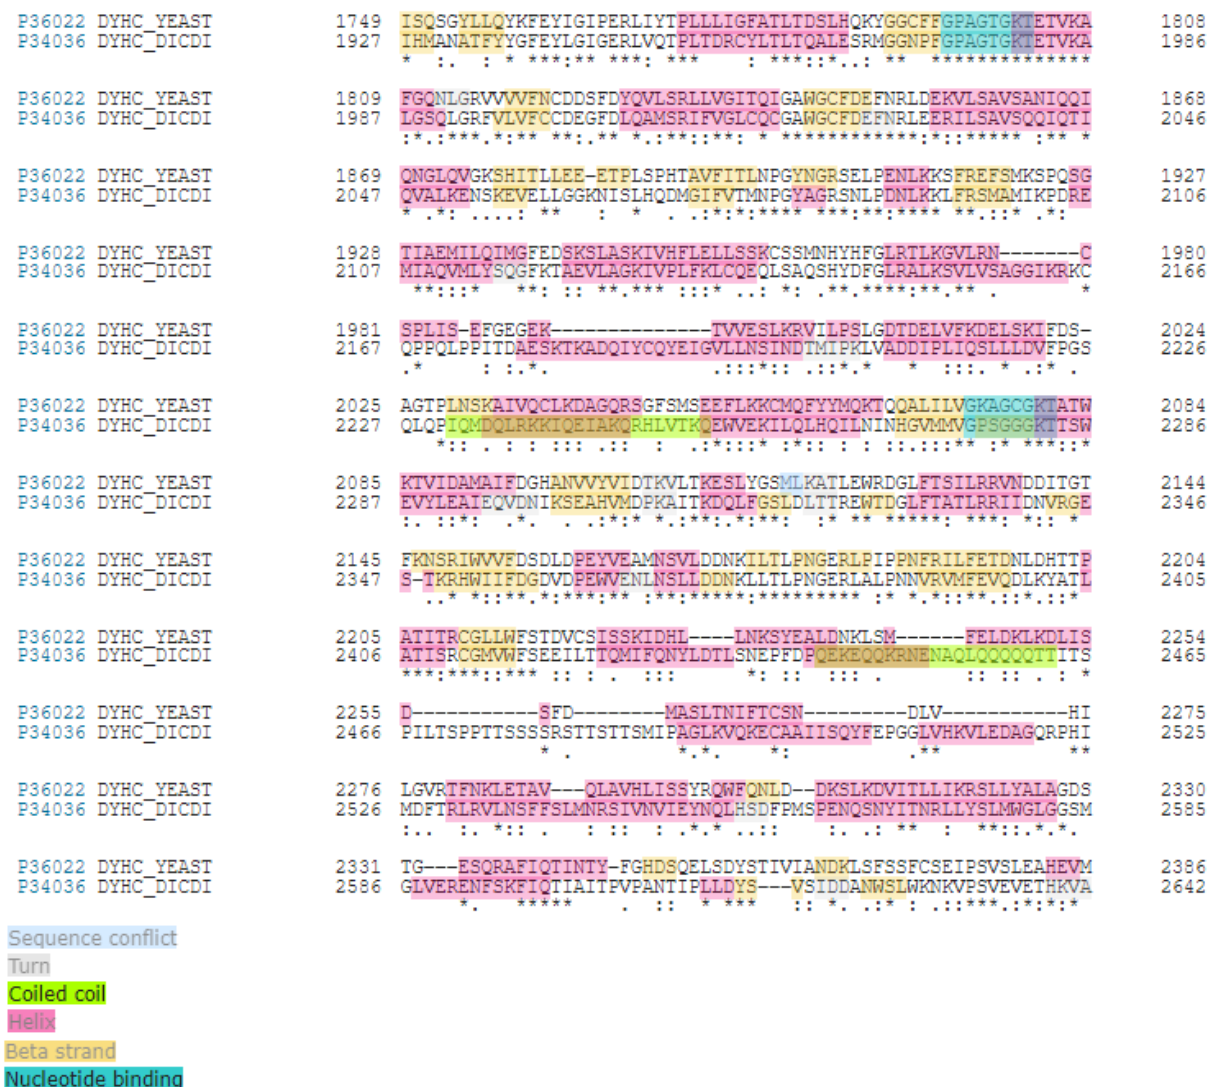

**Figure S1:** Amino acids sequence alignment of the AAA1 and AAA2 subunits of dynein corresponding to *S. cerevisiae* (1758-2273) and *D. discoideum* (1936-2531) with the ClustalW program. The W-A motif is highlighted in blue. The grey highlights represent sequence similarity. A singular dot (.) indicates that residues belong to a different group of amino acids, while a colon (:) Residues belong to the same group of amino acids and asterisk (\*) indicates sequence identity.

Figure S2

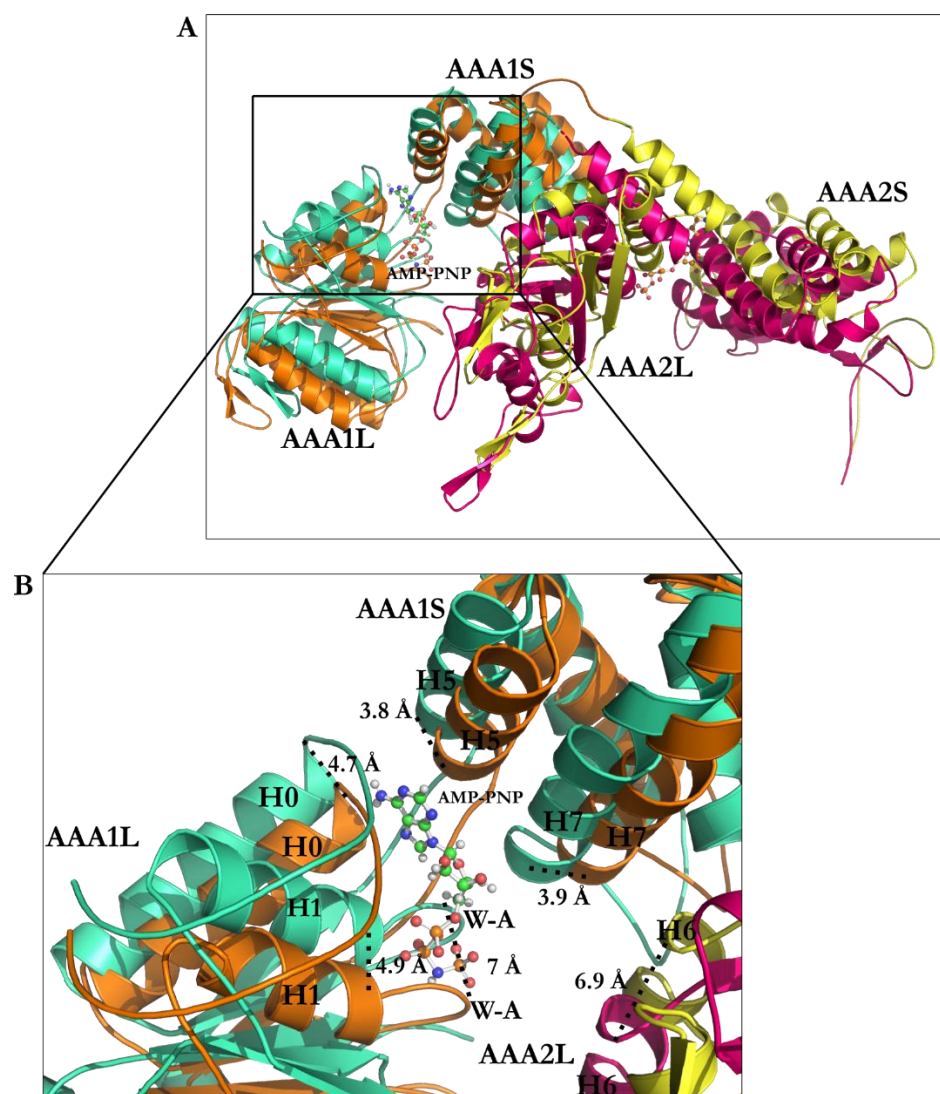

**Figure S2: A)** Structural alignment of the AAA1 and AAA2 of yeast-AMPPNP (4W8F) and yeast-apo (4AKG), **B)** A close-up of the AAA1 binding site. Helices (H0, H1, H5, and H7) of the AAA1 subdomain, the Walker-A (W-A) loops with the AMP-PNP in the ball and stick representation in green located at the AAA1 nucleotide-binding site and the H6 of the AAA2 subdomains of the yeast-AMPPNP (4W8F) and yeast-apo (4AKG). Color code: yeast-AMPPNP (AAA1 in green cyan and AAA2 in sharp pink) and yeast-apo (AAA1 in orange and AAA2 in yellow)

**Figure S3**

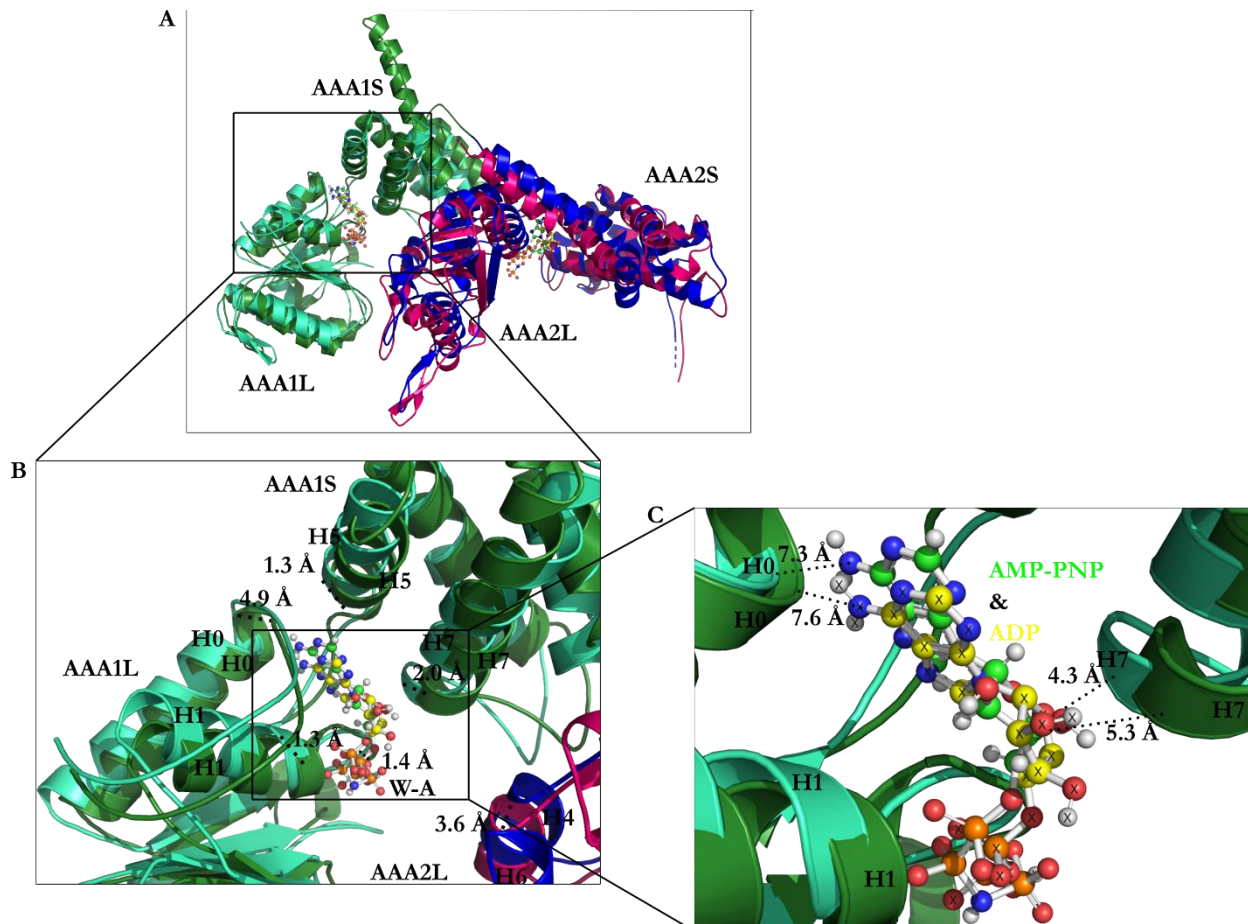

**Figure S3: A)** Structural alignment of the AAA1 and AAA2 subunit of the *Dictyostelium*-ADP (3VKG) and yeast-AMPPNP (4W8F), **B)** A close-up of the AAA1 binding site. Helices (H0, H1, H5, and H7) of the AAA1 subdomain, the Walker-A (W-A) loops with the AMP-PNP in the ball and stick representation in green and ADP in the ball and stick representation in yellow located at the AAA1 nucleotide-binding site and the H4 of the AAA2 subdomain of the *Dictyostelium*-ADP (3VKG) and the H6 of the AAA2 subdomain of the yeast-apo (4AKG), **C)** Structural alignment of ligands at the AAA1 nucleotide-binding site of the *Dictyostelium*-ADP (3VKG) and yeast-AMPPNP (4W8F) with AMP-PNP in the ball and stick representation in green and ADP in the ball and stick representation in yellow with a cross (x) on its atoms to distinguish them from the atoms of AMP-PNP. Color code: *Dictyostelium*-ADP (AAA1 in green and AAA2 in blue) and yeast-AMPPNP (AAA1 in green cyan and AAA2 in sharp pink)

Page 5 of 15

Figure S5

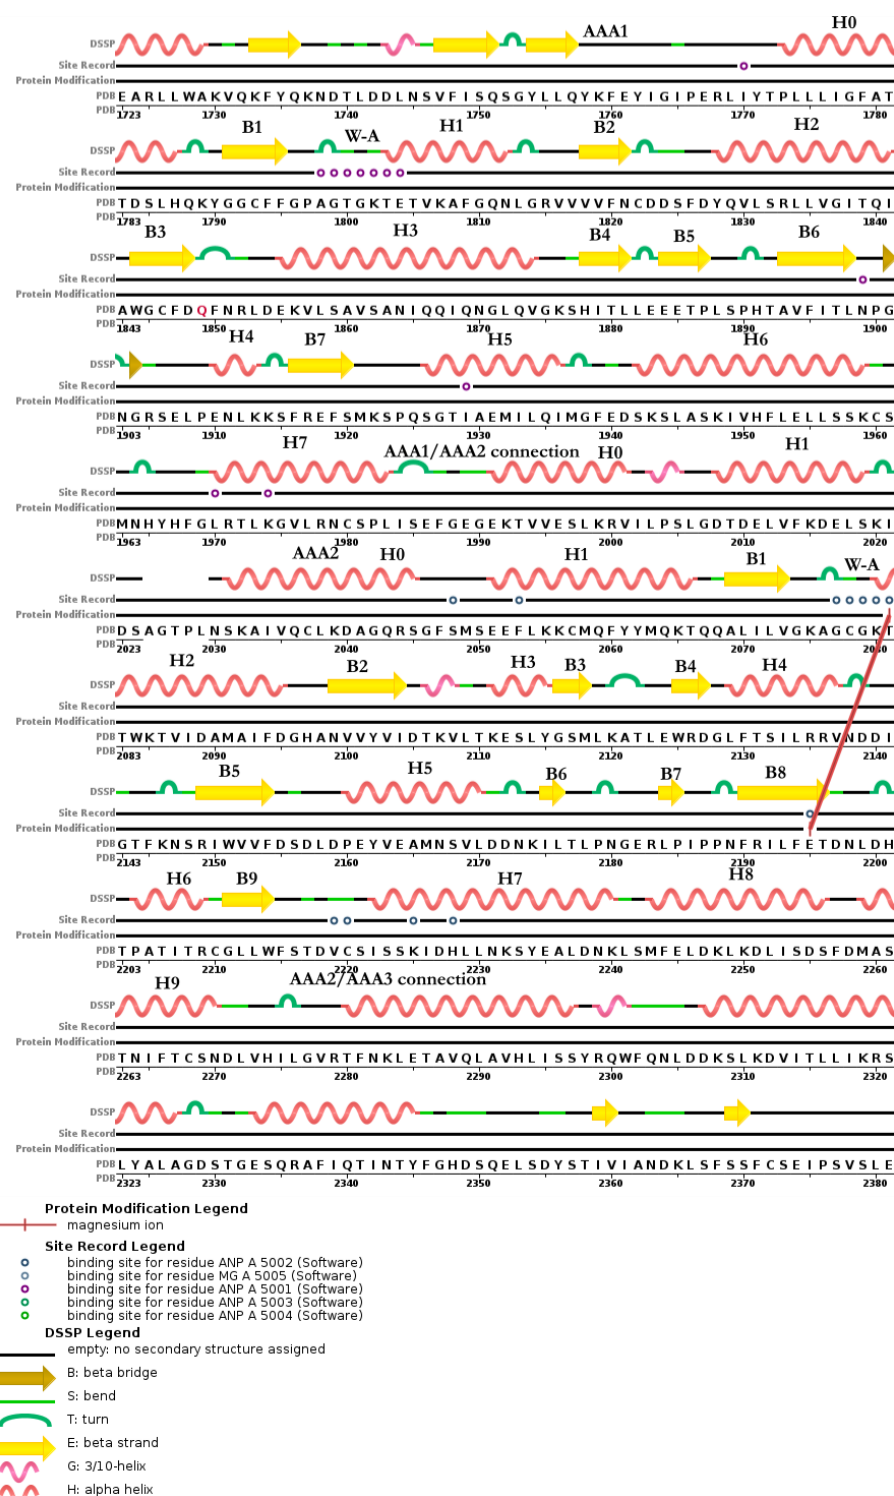

**Figure S5:** Annotation of the secondary structure of AAA1 and AAA2 domains of cytoplasmic dynein according to the 4W8F crystal structure retrieved from the PDB.

Figure S6

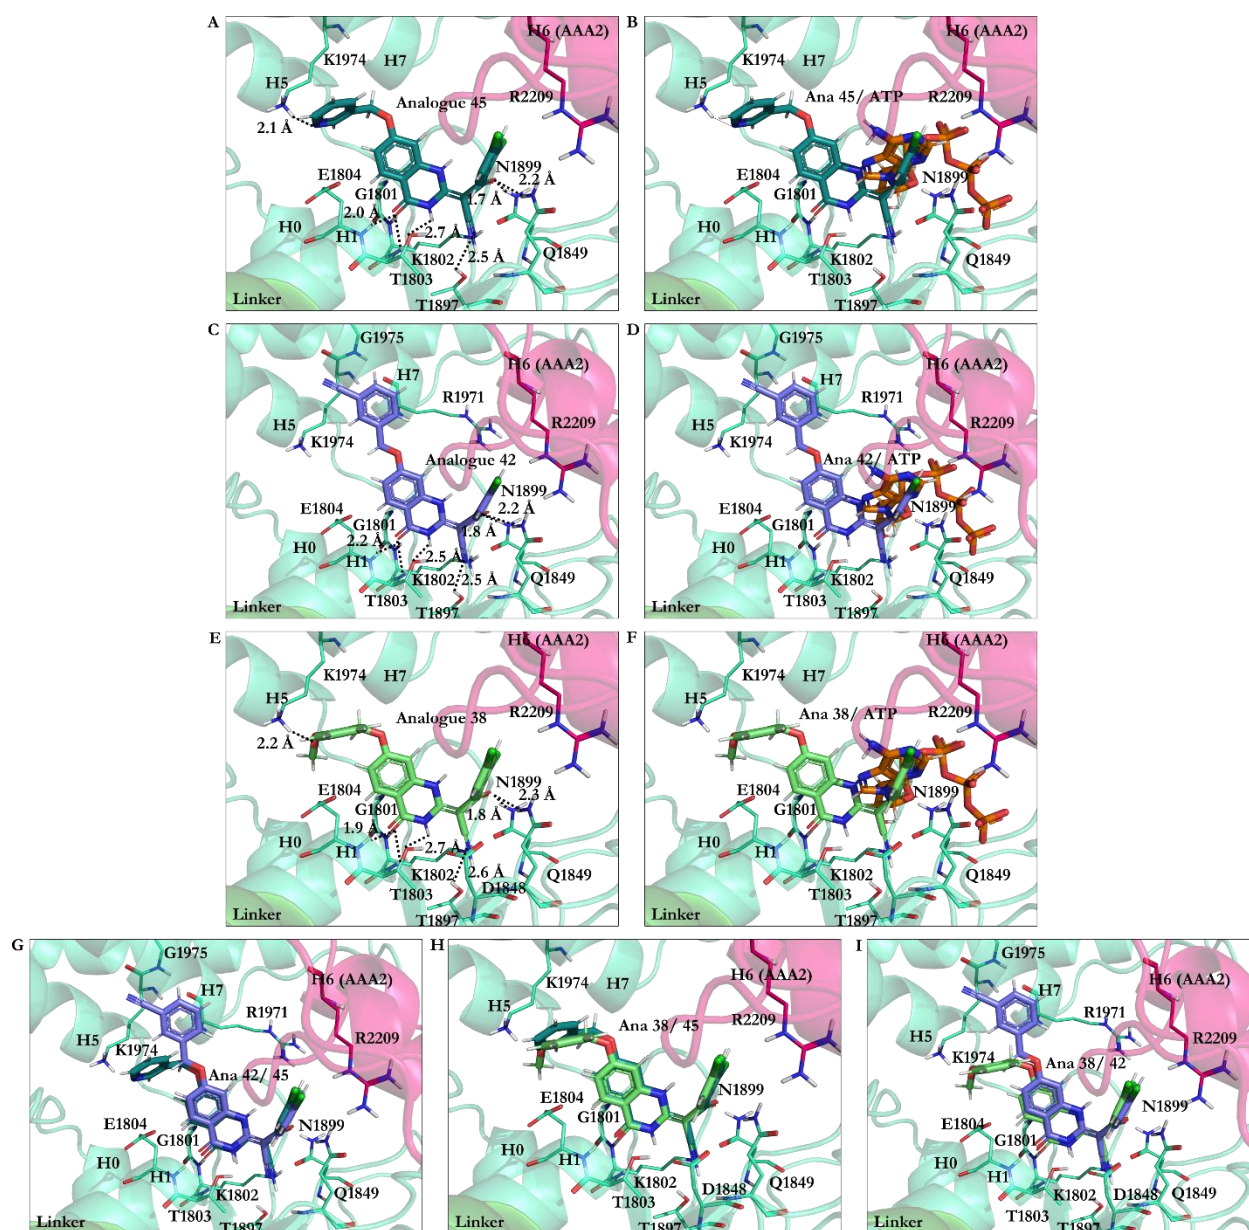

**Figure S6:** Binding modes of ciliobrevin analogs at the AAA1 binding site of dynein 1. **A)** Analog 45. **B)** Analog 45 superimposed on ATP, **C)** Analog 42, **D)** Analog 42 superimposed on ATP, **E)** Analog 38, **F)** Analog 38 superimposed on ATP. Superimposition of **G)** Analogs 42 and 45, **H)** Analogs 38 and 45, **I)** Analogs 38 and 42.

**Figure S7**

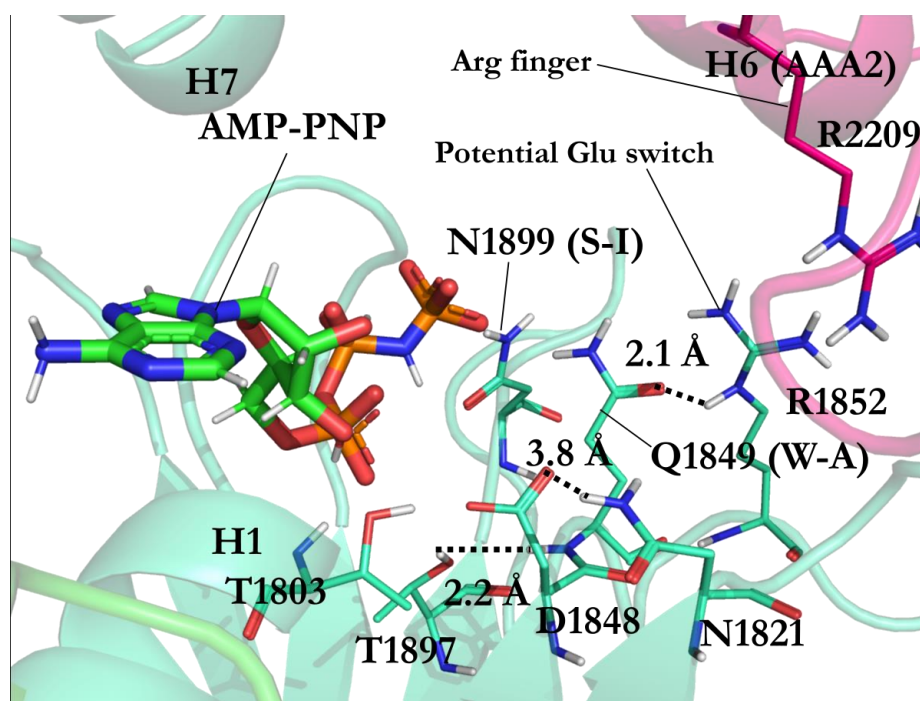

**Figure S7:** Intramolecular interactions between the catalytic residues at the AAA1 binding site and Arg1852 involving a potential glutamate switch. The docking solution of AMP-PNP is represented in green and stick. Thr1803 and Asp1848 accommodate  $Mg^{2+}$  during ATP hydrolysis. Sensor I (N1899), W-B (E1849Q), R-finger (R2209) play catalytic roles during ATP hydrolysis.

**Figure S8**

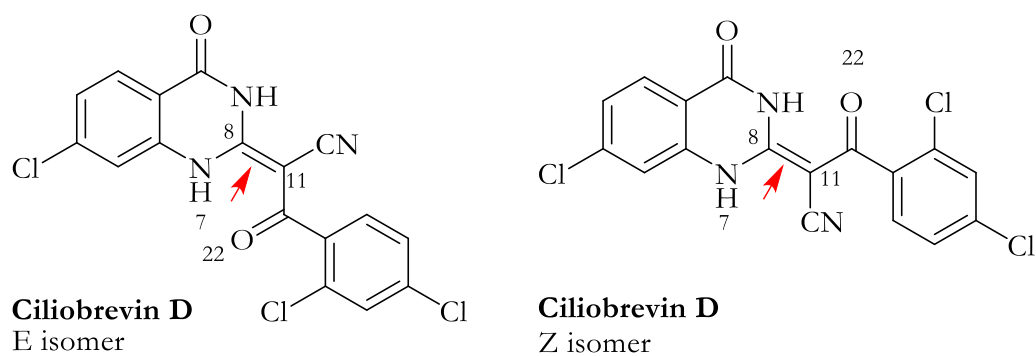

**Figure S8:** *E* and *Z* configurations of ciliobrevin D. Red arrows point to the double bond between the C8 and C11 atoms.

**Figure S9**

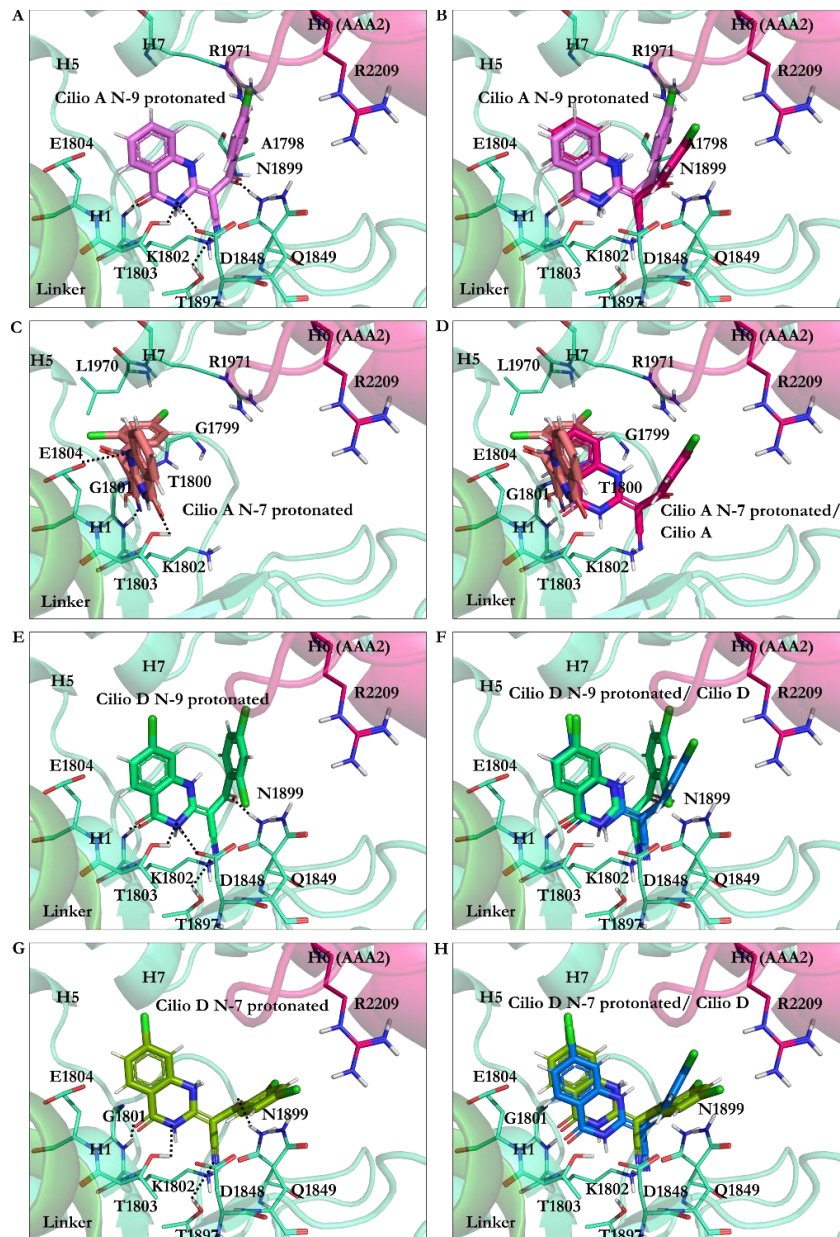

**Figure S9:** Binding modes of the protonated forms of ciliobrevin at the AAA1 binding site of dynein 1. **A)** Ciliobrevin A protonated at the N9 atom, **B)** Ciliobrevin A protonated at the N9 atom superimposed on ciliobrevin A, **C)** Ciliobrevin A protonated at the N7 atom, **D)** Ciliobrevin A protonated at the N7 atom superimposed on ciliobrevin A, **E)** Ciliobrevin D protonated at the N9 atom, **F)** Ciliobrevin D protonated at the N9 atom superimposed on ciliobrevin D, **G)** Ciliobrevin D protonated at the N7 atom, **H)** Ciliobrevin D protonated at the N7 atom superimposed on ciliobrevin D.

Figure S10

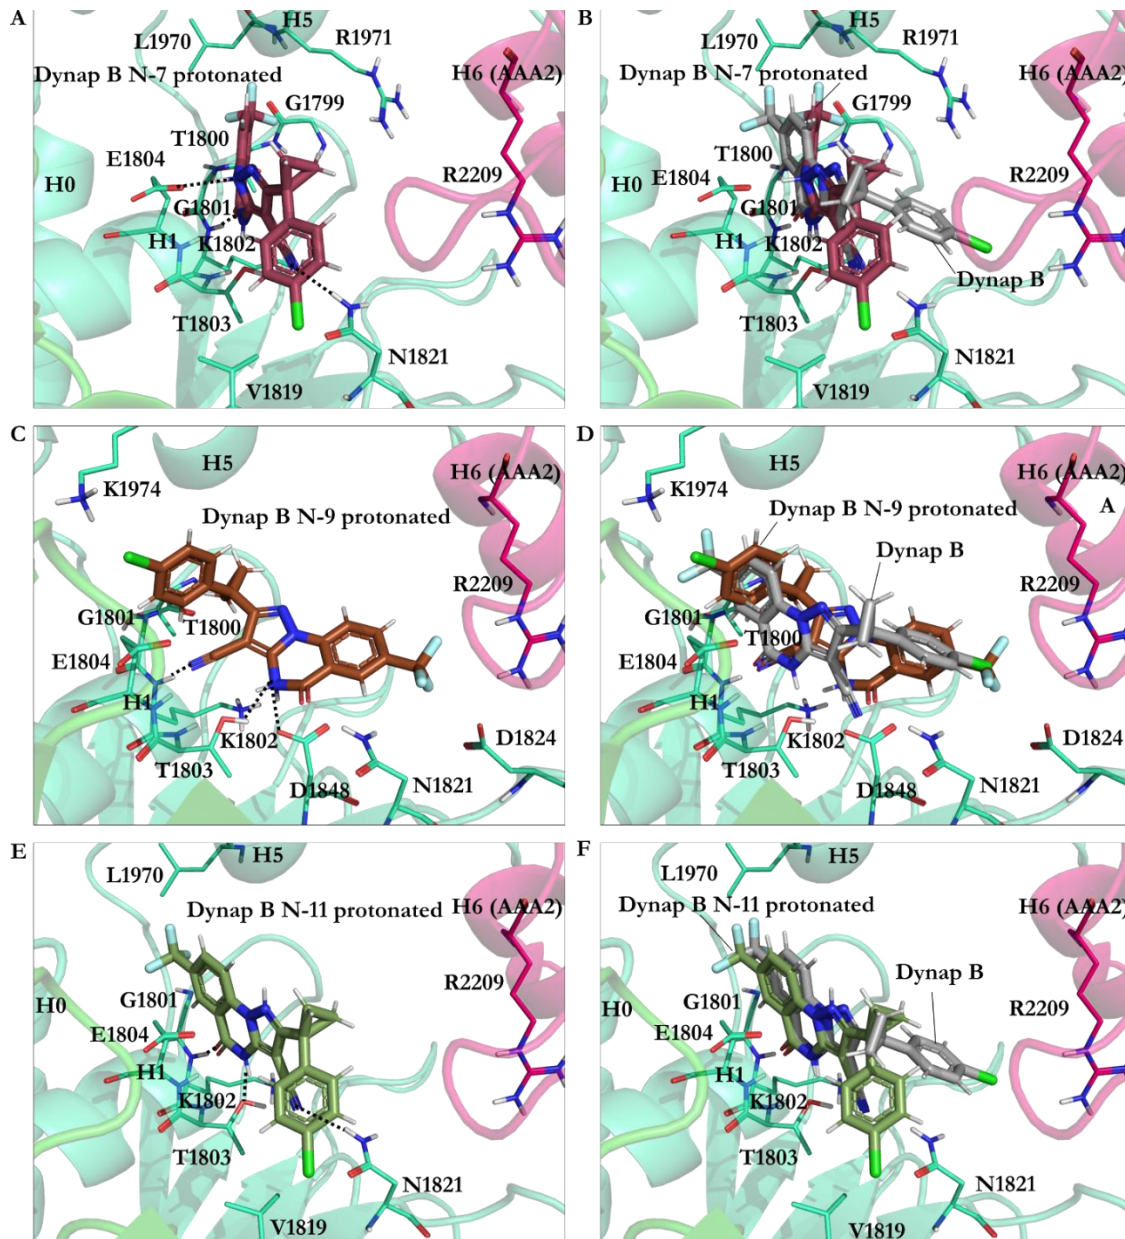

**Figure S10:** Main binding interactions of the protonated forms of dynaprazole B at the AAA1 binding site of dynein 1. **A)** Dynaprazole B protonated at the N7 atom, **B)** Dynaprazole A protonated at the N7 atom superimposed on dynaprazole B, **C)** Dynaprazole B protonated at the N9 atom, **D)** Dynaprazole B protonated at the N9 atom superimposed on dynaprazole A, **E)** Dynaprazole B protonated at the N11 atom, **F)** Dynaprazole B protonated at the N11 atom superimposed on dynaprazole B.

**Table S1**

| <b>Compound</b>  | <b>Binding<br/>Energy<br/>(kJ/mol)</b> | <b>Residues interacting with the compound</b>                              |
|------------------|----------------------------------------|----------------------------------------------------------------------------|
| <b>Analog 30</b> | -27.87                                 | Gly1801, Lys 1802, Thr1803, Glu1804, Asp1848,<br>Gln1849, Thr1897, Asn1899 |
| <b>Analog 29</b> | -27.37                                 | Gly1801, Lys1802, Thr1803, Glu1804, Asp1848,<br>Gln1849, Thr1897, Asn1899  |
| <b>Analog 28</b> | -27.27                                 | Gly1801, Lys1802, Thr1803, Glu1804, Asp1848,<br>Gln1849, Thr1897, Asn1899  |

**Table S1:** Networking interactions of analogs 28, 29, and 30 with AAA1 of dynein 1.

Table S2

| Compound         | Binding<br>energy<br>(kJ/mol) | Residues interacting with the ligand                                                        |
|------------------|-------------------------------|---------------------------------------------------------------------------------------------|
| <b>Analog 45</b> | -29.72                        | Gly1801, Lys1802, Thr1803, Glu1804, Gln1849,<br>Thr1897, Asn1899, Lys1974                   |
| <b>Analog 42</b> | -27.43                        | Gly1801, Lys1802, Thr1803, Glu1804, Gln1849,<br>Thr1897, Asn1899, Lys1974, Gly1975, Arg1971 |
| <b>Analog 38</b> | -27.27                        | Gly1801, Lys1802, Thr1803, Glu1804, Asp1848,<br>Gln1849, Thr1897, Asn1899, Lys1974          |

**Table S2:** Interacting amino acids with analogs 38, 42, and 45.

Table S3

| Compound                                 | Binding energy (kJ/mol) | Residues interacting with the docked ligand                                                       |
|------------------------------------------|-------------------------|---------------------------------------------------------------------------------------------------|
| <b>Ciliobrevin A</b><br><i>E</i> -isomer | −26.23                  | Gly1801, Lys1802, Thr1803, Glu1804, Asp1848, Gln1849, Thr1897, Asn1899                            |
| <b>Ciliobrevin A</b><br><i>Z</i> -isomer | −19.41                  | Thr1803, Asn1821, Asp1848, Gln1849, Arg 1852, Asn1899, Arg1852, Arg1971                           |
| <b>Ciliobrevin D</b><br><i>E</i> -isomer | −23.92                  | Gly1801, Lys1802, Thr1803, Glu1804, Asp1848, Gln1849, Thr1897, Asn1899                            |
| <b>Ciliobrevin D</b><br><i>Z</i> -isomer | −19.78                  | Gly1799, Thr1800, Gly1801, Lys1802, Thr1803, Glu1804, Asp1848, Gln1849, Leu1970, Arg1971, Lys1974 |
| <b><i>E</i>-Analog 22</b>                | −16.83                  | Ala1798, Gly1969, Tyr1902, Pro1900, Arg1971, His1967                                              |
| <b><i>Z</i>-Analog 22</b>                | −17.49                  | Leu1769, Gly1801, Lys1802, Glu1804, Leu1970, Lys1974                                              |

**Table S3:** The binding energy of *E* and *Z* isomers of ciliobrevin A and ciliobrevin D.

Table S4

| Compounds                                       | Binding energy (kJ/mol) | Residues interacting with the compound                                                    |
|-------------------------------------------------|-------------------------|-------------------------------------------------------------------------------------------|
| <b>Dynapyrazole B</b><br><b>N-7 protonated</b>  | -26.95                  | Gly1799, Thr1800, Gly1801, Lys1802, Thr1803, Glu 1804, Val1819, Asn1821, Leu1970, Arg1971 |
| <b>Dynapyrazole A</b><br><b>N-7protonated</b>   | -25.99                  | Gly1801, Lys1802, Thr1803, Glu1804, Asn1821                                               |
| <b>Dynapyrazole A</b><br><b>N-9 protonated</b>  | -19.81                  | Glu1586, Lys1696, Glu1699, Pro1766, Glu1767, Arg1978                                      |
| <b>Dynapyrazole B</b>                           | -18.49                  | Thr1800, Gly1801, Lys1802, Thr1803, Glu1804, Asn1821, Leu1970                             |
| <b>Dynapyrazole B</b><br><b>N-9 protonated</b>  | -18.47                  | Thr1800, Gly1801, Lys1802, Thr1803, Glu1804, Asn1821, Asp1824, Asp1848, Lys1974           |
| <b>Dynapyrazole A</b>                           | -18.17                  | Gly1801, Lys1802, Thr1803, Glu1804, Asn1821                                               |
| <b>Dynapyrazole A</b><br><b>N-11 protonated</b> | -17.49                  | Lys 1802, Thr1803, Glu1804, Asp1848, Gln1849, Asn1899                                     |
| <b>Dynapyrazole B</b><br><b>N-11 protonated</b> | -17.13                  | Gly1801, Lys1802, Thr1803, Glu1804, Val1819, Asn1821, Leu1970                             |

**Table S4:** Interacting amino acids with dynapyrazole A and B in the protonated and deprotonated states.
